# Supplementary material
Source: PubMed Central journal article supplement (PMC5864130)

SUPPLEMENTARY DATA

**Supplementary Figure S1.** AUC for glucagon (A) and glucose (B) concentrations following a meal challenge at baseline and at 12 weeks in all groups in patients with type 1 diabetes. \*=P<0.05 compared to 0 week.

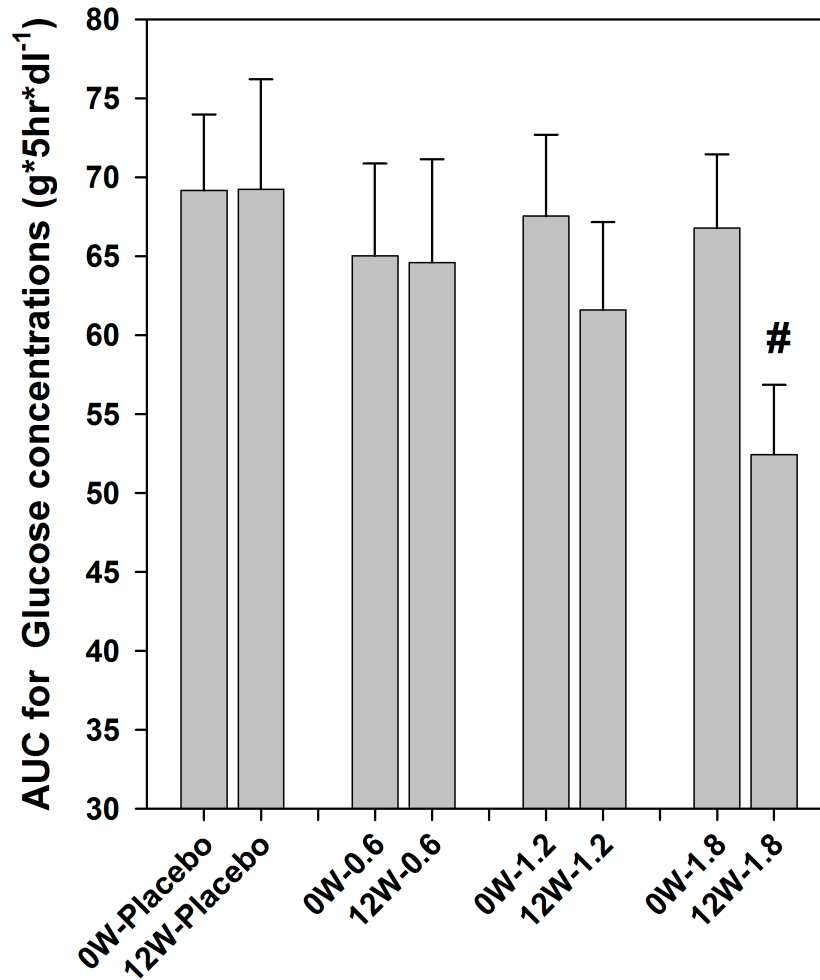

SUPPLEMENTARY DATA

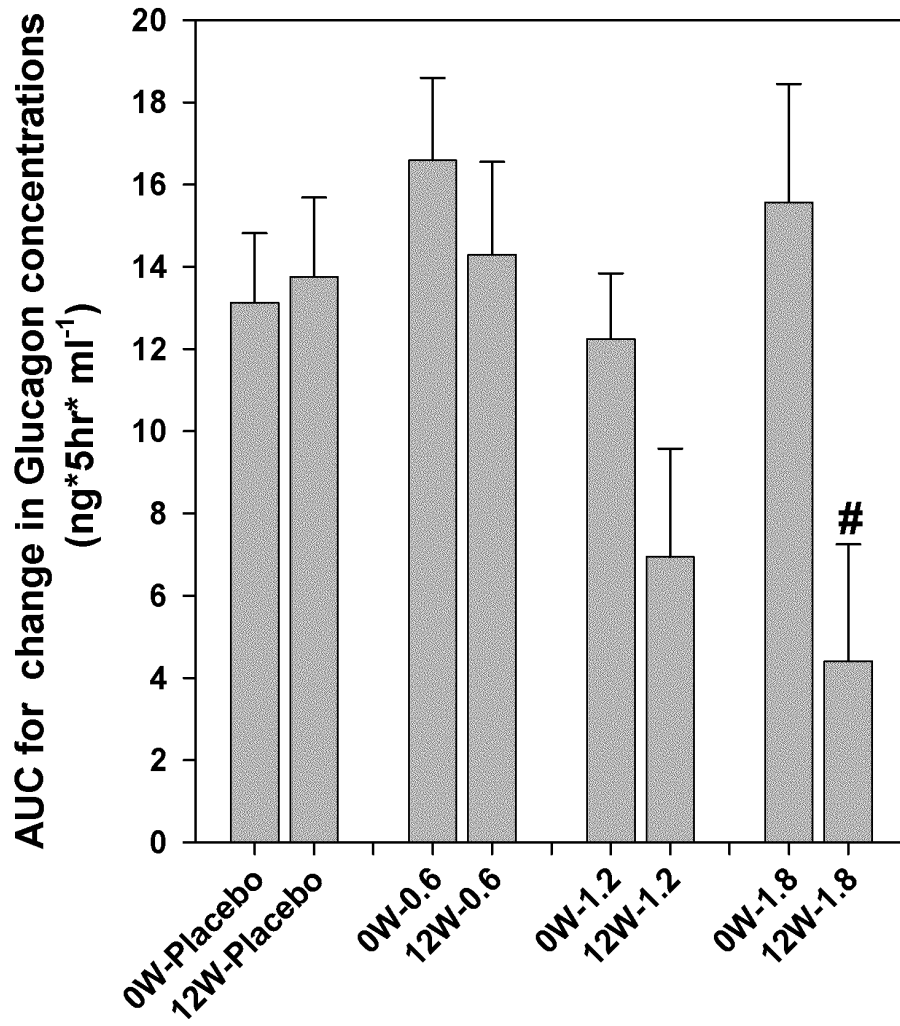

Supplement: DC151136SupplementaryData.pdf [file DC151136SupplementaryData.pdf]
